# Supplementary material
Source: MDPI journal article supplement (https://www.mdpi.com/2073-445X/11/10/1812)
Supplement: s1 [file s1]

Article

# The Effective Use of National Recovery and Resilience Plan Funding: A Methodological Approach for the Optimal Assessment of the Initiative Costs

Francesco Tajani <sup>1</sup>, Felicia Di Liddo <sup>2</sup> and Rossana Ranieri <sup>1</sup>

<sup>1</sup> Department of Architecture and Design, Sapienza University of Rome, Italy

<sup>2</sup> Department of Civil, Environmental, Land, Building Engineering and Chemistry, Polytechnic University of Bari, Italy

\* Correspondence: francesco.tajani@uniroma1.it

## *Santa Maria della Pietà* monumental compendium

| Pavillion [No.]              | GFA [m <sup>2</sup> ] | Optimal Cost [€] | Official Cost [€] | Δ [%] |
|------------------------------|-----------------------|------------------|-------------------|-------|
| 5                            | 1,688                 | 2,192,300        | 2,236,146         | 2.00  |
| 6                            | 1,629                 | 716,760          | 738,263           | 3.00  |
| 7                            | 1,350                 | 2,704,191        | 2,744,754         | 1.50  |
| 16                           | 2,140                 | 3,194,841        | 3,220,400         | 0.80  |
| 18                           | 2,370                 | 3,681,992        | 3,733,540         | 1.40  |
| 23                           | 1,500                 | 2,305,937        | 2,398,174         | 4.00  |
| 24                           | 396                   | 804,963          | 869,360           | 8.00  |
| 25                           | 740                   | 1,534,445        | 1,649,528         | 7.50  |
| 28                           | 3,790                 | 4,815,681        | 4,873,469         | 1.20  |
| 31                           | 1,900                 | 2,815,653        | 2,855,072         | 1.40  |
| 41                           | 750                   | 1,552,106        | 1,676,274         | 8.00  |
| TOTAL CONSTRUCTION COSTS [€] |                       | 26,318,869       | 26,994,980        |       |
| INDIRECT COSTS (25%) [€]     |                       | 6,579,717        | 6,748,745         |       |
| TOTAL INITIATIVE COSTS [€]   |                       | 32,898,586       | 33,743,725        |       |

## *Tor Bella Monaca* public housing compendium

| Intervention                                  | GFA [m <sup>2</sup> ] | Optimal Cost [€] | Official Cost [€] | Δ [%] |
|-----------------------------------------------|-----------------------|------------------|-------------------|-------|
| <i>North Building</i>                         |                       |                  |                   |       |
| BUILDING ENERGY RECOVERY AND UPGRADING        |                       |                  |                   |       |
| <i>Floor -1</i>                               |                       |                  |                   |       |
| Demolition of staircases                      | 57.00                 | 4,959.52         | 5,133.10          | 3.5   |
| Redevelopment of existing underground parking | 2,403.63              | 2,169,703.78     | 2,213,097.86      | 2     |

|                                                        |          |              |              |     |
|--------------------------------------------------------|----------|--------------|--------------|-----|
| Functional reconversion of parking space into basement | 486.54   | 439,188.93   | 445,776.76   | 1.5 |
| Upgrading of staircase                                 | 240.00   | 216,642.71   | 231,807.70   | 7   |
| Expansion of parking space                             | 1,726.86 | 1,558,798.43 | 1,652,326.34 | 6   |
| <b>Floor 0</b>                                         |          |              |              |     |
| Demolition of staircases                               | 85.00    | 7,395.78     | 7,691.61     | 4   |
| Demolition of balcony                                  | 590.00   | 51,335.38    | 53,388.80    | 4   |
| Residential units redevelopment                        | 1,543.87 | 1,393,619.20 | 1,414,523.49 | 1.5 |
| Services redevelopment                                 | 260.10   | 234,786.53   | 244,177.99   | 4   |
| Energy retrofitting                                    | 553.06   | 198,666.42   | 210,586.41   | 6   |
| Upgrading of staircase and hallway                     | 306.32   | 276,504.88   | 290,330.12   | 5   |
| Building of new slab                                   | 258.60   | 285,591.17   | 297,014.82   | 4   |
| <b>Floor 1</b>                                         |          |              |              |     |
| Energy retrofitting                                    | 2,575.01 | 924,974.68   | 971,223.41   | 5   |
| Upgrading of staircase and hallway                     | 482.00   | 532,308.37   | 564,246.87   | 6   |
| Upgrading of staircase                                 | 237.87   | 85,447.38    | 91,428.70    | 7   |
| Demolition of loggias facing the street                | 33.19    | 2,888.04     | 3,003.56     | 4   |
| Loggias realization                                    | 96.60    | 106,682.55   | 114,150.33   | 7   |
| <b>Floor 2</b>                                         |          |              |              |     |
| Energy retrofitting                                    | 2,821.03 | 1,013,349.58 | 1,053,883.56 | 4   |
| Upgrading of staircase                                 | 208.63   | 74,942.79    | 80,188.79    | 7   |
| <b>Floor 3</b>                                         |          |              |              |     |
| Energy retrofitting                                    | 2,821.03 | 1,013,349.58 | 1,074,150.55 | 6   |
| Upgrading of staircase                                 | 208.63   | 74,942.79    | 80,188.79    | 7   |
| <b>Floor 4</b>                                         |          |              |              |     |
| Energy retrofitting                                    | 2,867.78 | 1,030,142.76 | 1,071,348.47 | 4   |
| Upgrading of staircase                                 | 208.63   | 74,942.79    | 79,963.96    | 6.7 |
| <b>Floor 5</b>                                         |          |              |              |     |
| Energy retrofitting                                    | 2,867.78 | 1,030,142.76 | 1,066,197.76 | 3.5 |
| Upgrading of staircase                                 | 208.63   | 74,942.79    | 79,814.07    | 6.5 |
| <b>Floor 6</b>                                         |          |              |              |     |
| Energy retrofitting                                    | 2,128.92 | 764,734.12   | 790,735.08   | 3.4 |
| Upgrading of staircase                                 | 151.63   | 54,466.71    | 57,625.78    | 5.8 |
| <b>Floor 7</b>                                         |          |              |              |     |
| Energy retrofitting                                    | 2,128.92 | 764,734.12   | 789,970.35   | 3.3 |
| Upgrading of staircase                                 | 151.63   | 54,466.71    | 57,625.78    | 5.8 |

#### South Building

#### BUILDING ENERGY RECOVERY AND UPGRADING

|                                               |          |              |              |     |
|-----------------------------------------------|----------|--------------|--------------|-----|
| <b>Floor -1</b>                               |          |              |              |     |
| Demolition of staircases                      | 66.00    | 5,742.60     | 6,035.47     | 5.1 |
| Redevelopment of existing underground parking | 2,288.37 | 2,065,661.12 | 2,113,171.33 | 2.3 |

|                                                        |          |              |              |     |
|--------------------------------------------------------|----------|--------------|--------------|-----|
|                                                        |          |              |              |     |
| Functional reconversion of parking space into basement | 197.88   | 178,621.91   | 193,268.91   | 8.2 |
| Functional reconversion of parking space into services | 125.46   | 113,249.97   | 123,102.72   | 8.7 |
| Upgrading of staircase                                 | 234.19   | 211,395.35   | 227,038.61   | 7.4 |
| Expansion of parking spaces                            | 1,585.08 | 1,430,816.75 | 1,489,480.24 | 4.1 |
| <b>Floor 0</b>                                         |          |              |              |     |
| Demolition of staircases                               | 92.00    | 8,004.84     | 8,685.25     | 8.5 |
| Demolition of balcony                                  | 757.00   | 65,865.90    | 71,003.44    | 7.8 |
| Residential units redevelopment                        | 1,757.25 | 1,586,228.56 | 1,622,711.82 | 2.3 |
| Services redevelopment                                 | 362.95   | 327,626.96   | 348,595.09   | 6.4 |
| Energy retrofitting                                    | 553.06   | 198,666.42   | 212,970.40   | 7.2 |
| Upgrading of staircase and hallway                     | 331.91   | 299,606.03   | 317,882.00   | 6.1 |
| Building of new slab                                   | 318.60   | 351,853.62   | 374,372.25   | 6.4 |
| <b>Floor 1</b>                                         |          |              |              |     |
| Energy retrofitting                                    | 2,898.53 | 1,041,189.62 | 1,083,878.39 | 4.1 |
| Upgrading of staircase and hallway                     | 96.60    | 106,682.55   | 113,510.23   | 6.4 |
| Upgrading of staircase                                 | 282.77   | 101,574.34   | 108,075.10   | 6.4 |
| Demolition of loggias facing the street                | 44.26    | 3,850.71     | 4,085.60     | 6.1 |
| Loggias realization                                    | 123.00   | 135,838.03   | 144,531.66   | 6.4 |
| <b>Floor 2</b>                                         |          |              |              |     |
| Energy retrofitting                                    | 3,268.50 | 1,174,084.78 | 1,201,088.73 | 2.3 |
| Upgrading of staircase                                 | 242.02   | 86,936.79    | 91,631.38    | 5.4 |
| <b>Floor 3</b>                                         |          |              |              |     |
| Energy retrofitting                                    | 3,268.50 | 1,174,084.78 | 1,210,481.41 | 3.1 |
| Upgrading of staircase                                 | 242.02   | 86,936.79    | 92,413.81    | 6.3 |
| <b>Floor 4</b>                                         |          |              |              |     |
| Energy retrofitting                                    | 3,343.15 | 1,200,901.96 | 1,265,750.67 | 5.4 |
| Upgrading of staircase                                 | 242.02   | 86,936.79    | 93,370.11    | 7.4 |
| <b>Floor 5</b>                                         |          |              |              |     |
| Energy retrofitting                                    | 3,343.15 | 1,200,901.96 | 1,266,951.57 | 5.5 |
| Upgrading of staircase                                 | 242.02   | 86,936.79    | 93,196.24    | 7.2 |
| <b>Floor 6</b>                                         |          |              |              |     |
| Energy retrofitting                                    | 2,604.29 | 935,493.32   | 957,009.67   | 2.3 |
| Upgrading of staircase                                 | 188.58   | 67,739.43    | 72,752.15    | 7.4 |
| <b>Floor 7</b>                                         |          |              |              |     |
| Energy retrofitting                                    | 2,604.29 | 935,493.32   | 958,880.65   | 2.5 |
| Upgrading of staircase                                 | 188.58   | 67,739.43    | 71,194.14    | 5.1 |
| <b>Public spaces</b>                                   |          |              |              |     |
| <b>Internal Courtyard Recovery - NORTH</b>             |          |              |              |     |
| Public space (courts)                                  | 1,150.00 | 107,832.43   | 112,684.89   | 4.5 |
| Park/garden area and sports field                      | 3,800.00 | 356,315.84   | 360,591.63   | 1.2 |

|                                               |           |              |              |     |
|-----------------------------------------------|-----------|--------------|--------------|-----|
|                                               |           |              |              |     |
| <i>Internal Courtyard Recovery - SOUTH</i>    |           |              |              |     |
| Park area                                     | 2,950.00  | 276,613.61   | 288,784.61   | 4.4 |
| Public space                                  | 1,251.00  | 117,302.93   | 122,464.26   | 4.4 |
| Road surfaces and parking spaces              | 1,115.00  | 67,371.65    | 70,268.63    | 4.3 |
| Agricultural Park                             | 5,440.00  | 236,664.81   | 250,864.70   | 6   |
| <i>Avenue Recovery</i>                        |           |              |              |     |
| Recovery of Avenue                            | 6,400.00  | 600,110.89   | 636,117.54   | 6   |
| Parking spaces                                | 3,612.00  | 218,247.88   | 225,231.81   | 3.2 |
| Streets facilities                            | 8,760.00  | 438,000.00   | 455,520.00   | 4   |
| Tree-lined sidewalk                           | 748.00    | 54,235.68    | 55,320.39    | 2   |
| Tower-side parking spaces with trees          | 2,711.50  | 163,836.96   | 167,113.70   | 2   |
| Public spaces                                 | 561.00    | 52,603.47    | 54,918.02    | 4.4 |
| Archaeological parking spaces and sidewalk    | 1,100.00  | 66,465.30    | 69,788.57    | 5   |
| <i>Internal Courtyard Parking Recovery</i>    |           |              |              |     |
| Private gardens                               | 430.00    | 40,319.95    | 42,335.95    | 5   |
| Public space                                  | 1,450.00  | 135,962.62   | 142,760.75   | 5   |
| Tree-lined parking spaces                     | 2,550.00  | 154,078.65   | 157,160.22   | 2   |
| <i>Mineral Court Recovery</i>                 |           |              |              |     |
| Private gardens                               | 430.00    | 40,319.95    | 41,368.27    | 2.6 |
| Public space/garden                           | 2,083.00  | 195,317.34   | 200,395.59   | 2.6 |
| New tree-lined parking space                  | 2,150.00  | 129,909.45   | 134,196.46   | 3.3 |
| <i>Archaeological Area Recovery</i>           |           |              |              |     |
| Crossing paths                                | 1,200.00  | 69,607.30    | 73,783.74    | 6   |
| Green works, irrigation system, lighting      | 10,000.00 | 435,045.60   | 445,051.65   | 2.3 |
| Tree planting [cadauno]                       | 25.00     | 12,500.00    | 12,800.00    | 2.4 |
| <i>Agro side connections</i>                  |           |              |              |     |
| Public space                                  | 1,326.00  | 124,335.48   | 127,195.20   | 2.3 |
| Road                                          | 7,775.00  | 233,250.00   | 247,245.00   | 6   |
| <i>New construction</i>                       |           |              |              |     |
| <i>Internal Courtyard - NORTH</i>             |           |              |              |     |
| Demolition of Pavilion 1                      | 275.00    | 23,927.51    | 25,482.80    | 6.5 |
| Excavation and earthworks for hypogeum spaces | 16,400.00 | 832,387.25   | 874,006.61   | 5   |
| Museum (hypogeum)                             | 1,765.00  | 2,902,913.15 | 3,048,058.81 | 5   |
| Retaining structures                          | 1,100.00  | 370.876,37   | 389,420.19   | 5   |
| <i>Internal Courtyard - SOUTH</i>             |           |              |              |     |
| Demolition of Pavilions 2 and 3               | 522.00    | 45,418.76    | 48,461.82    | 6.7 |
| Excavation and earthworks for hypogeal spaces | 4,000.00  | 203,021.28   | 214,187.45   | 5.5 |
| Hypogeum collaboratory                        | 510.00    | 838,802.10   | 895,001.84   | 6.7 |
| Playroom reconstruction                       | 510.00    | 620,012.10   | 662,792.93   | 6.9 |
| Retaining structures                          | 200.00    | 67,432.07    | 70,803.67    | 5   |

|                                    |               |               |
|------------------------------------|---------------|---------------|
| TOTAL CONSTRUCTION COSTS [€]       | 39,711,474.68 | 41,702,435.73 |
| INDIRECT COSTS (25%) [€]           | 9,927,868.67  | 10,425,608.93 |
| TOTAL INITIATIVE COSTS [€]         | 49,639,343.35 | 52,128,044.66 |
| TOTAL COSTS OF THE TWO INITIATIVES | 82,537,929.6  | 85,871,769.7  |

**Table S1.** Summary of the *Santa Maria della Pietà* monumental compendium and *Tor Bella Monaca* public housing compendium initiatives: identification of the GFA, of the optimal costs and the official costs, and the percentage differential ( $\Delta$ ) between the official costs and the optimal costs for each intervention.
